# Supplementary material for: Small-molecule inhibitors of PD-1/PD-L1 immune checkpoint alleviate the PD-L1-induced exhaustion of T-cells
Source: PubMed Central journal article supplement (PMC5641120; doi:10.18632/oncotarget.20050), 2017-08-07
Supplement: oncotarget-08-72167-s001.pdf [file oncotarget-08-72167-s001.pdf]

## Small-molecule inhibitors of PD-1/PD-L1 immune checkpoint alleviate the PD-L1-induced exhaustion of T-cells

### SUPPLEMENTARY MATERIALS

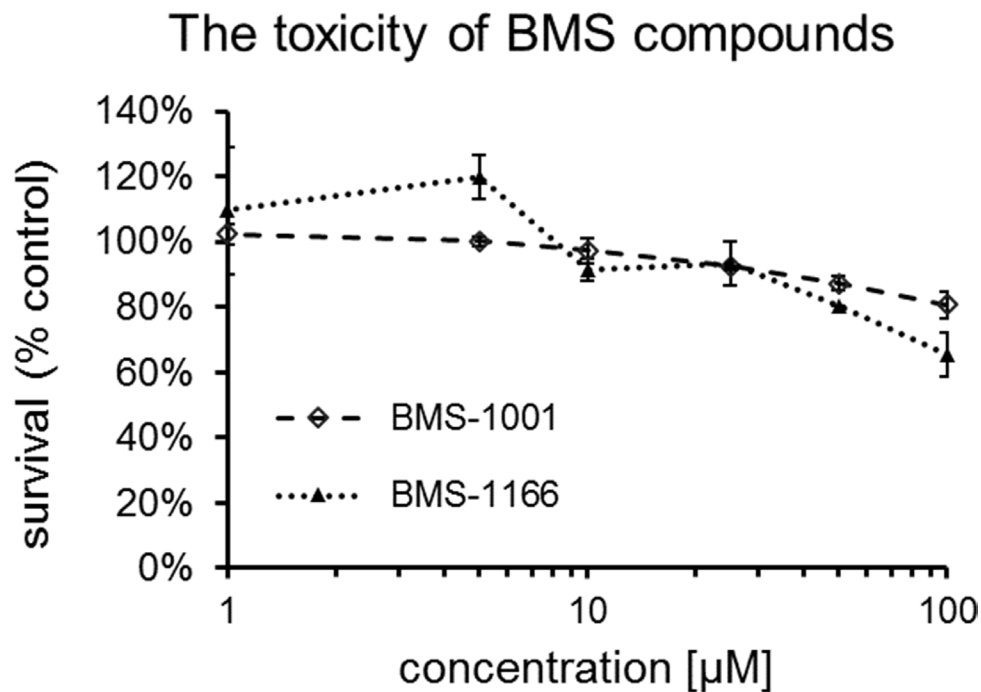

**Supplementary Figure 1: The toxicity of BMS-1001 and -1166 towards aAPCs.** The toxicity of BMS-1001 and -1166 compounds against the PD-L1 aAPC/CHO-K1 cells (aAPCs) was tested following the 48 h treatment with the indicated concentrations of the compounds. The graph shows the representative result from 3 experiments.

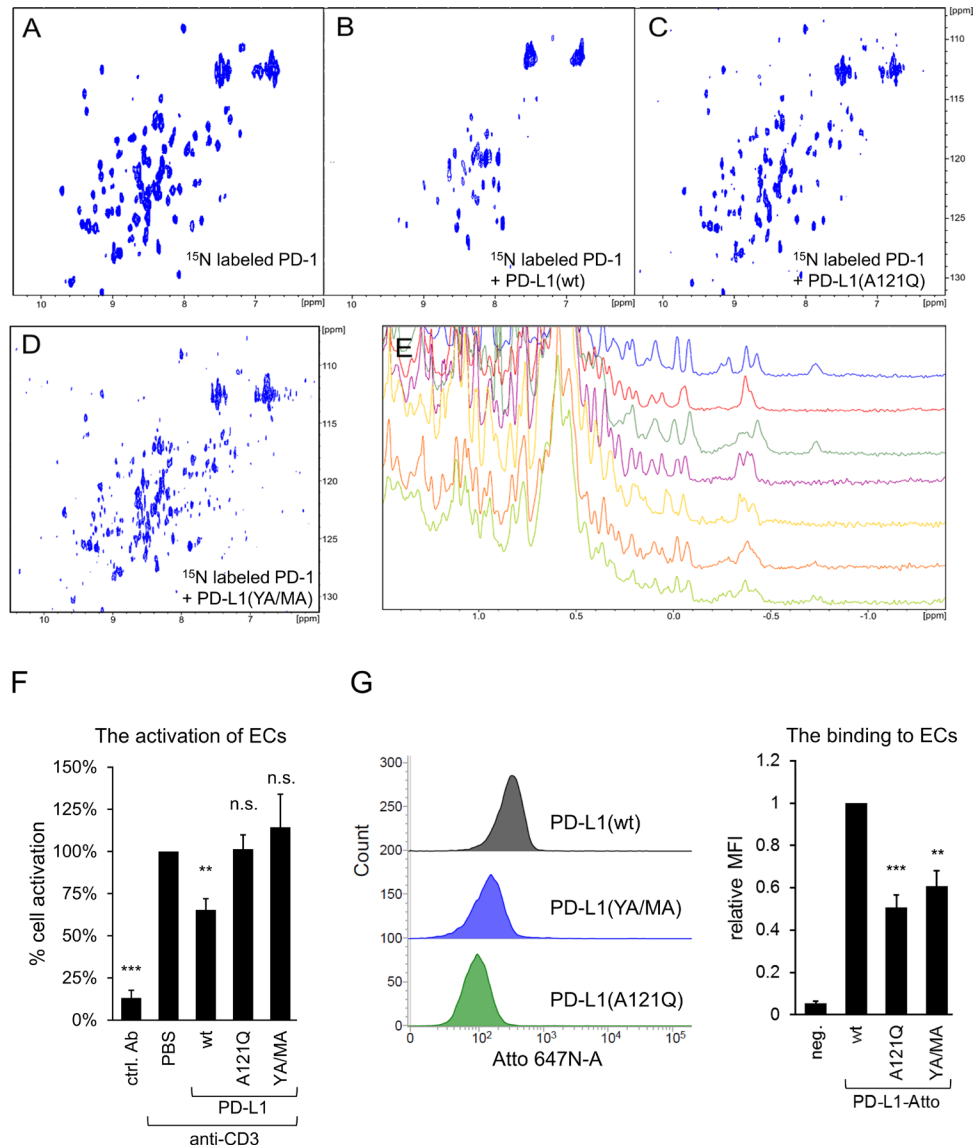

**Supplementary Figure 2: The analysis of PD-L1(A121Q) and PD-L1(Y56A, M115A) in respect to PD-1 binding and activating potential of ECs.** (A–D)  $^1\text{H}$ - $^{15}\text{N}$  HMQC spectra of the  $^{15}\text{N}$  labeled hPD-1 alone (A),  $^{15}\text{N}$  labeled hPD-1 and unlabeled hPD-L1(wt) (B),  $^{15}\text{N}$  labeled hPD-1 and unlabeled PD-L1(A121Q) (C), and  $^{15}\text{N}$  labeled hPD-1 and unlabeled PD-L1(Y56A, M115A), called PD-L1(YA/MA) (D). (B) Only a small number of cross-peaks are detected due to the increased relaxation associated with the formation of PD-1/PD-L1 complex. (C, D) No changes in chemical shifts of the  $^{15}\text{N}$  labeled hPD-1 are observed upon the addition of slight excess of the mutant proteins, which indicates the lack of interaction of the proteins with PD-1. (E) The aliphatic regions of the  $^1\text{H}$  NMR spectra are shown. At ca.  $\delta = 0.4$  ppm the NMR signals from hPD-1 (blue) and wt-hPD-L1 (red) overlay and broaden in the spectrum of the pre-formed hPD-1/wt-hPD-L1 complex (green). In the spectra of hPD-1 and the A121Q mutant (purple), and YA/MA (yellow) only overlapping signals from hPD-1 (blue) and the A121Q mutant (orange), and YA/MA (light green) are observed. (F) ECs were activated for 24 h with the anti-CD3 antibody alone or in the presence of sPD-L1(wt) or the indicated mutants. The activity of luciferase was determined as an indicator of cell activation. The graphs present mean  $\pm$  SEM from at least three independent experiments. Statistical significance was evaluated using a one-way ANOVA with the Tukey's post-hoc test: \*\* $p < 0.01$ , \*\*\* $p < 0.001$ . (G) The binding of the fluorescently-labeled PD-L1(wt), PD-L1(A121Q) or PD-L1(YA/MA) to aAPCs determined using flow cytometry. MFI – relative Geo Mean Fluorescence Intensity values. The bar graphs present mean  $\pm$  SEM from three independent experiments. For the statistics,  $t$ -test was used: \*\* $p < 0.01$ , \*\*\* $p < 0.001$ .

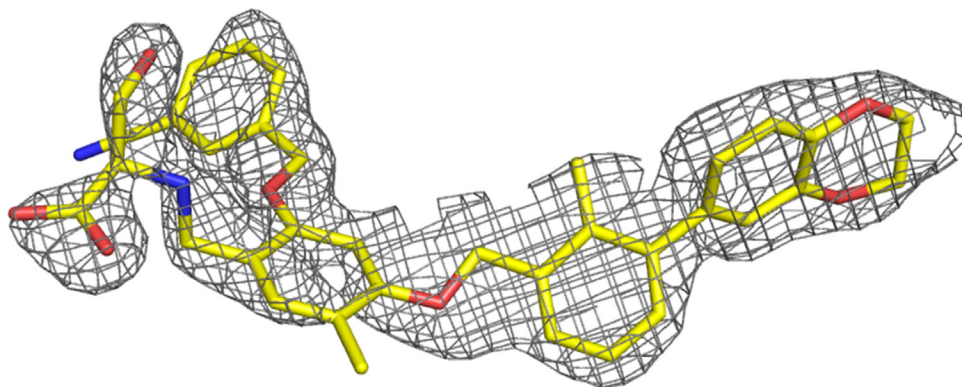

**Supplementary Figure 3: Quality of electron density map for BMS-1001 molecule located inside the PD-L1 dimer.** Example of the 2Fo-Fc omit map contoured at  $1\sigma$  shows the well-defined density for the BMS-1001 compound molecule.

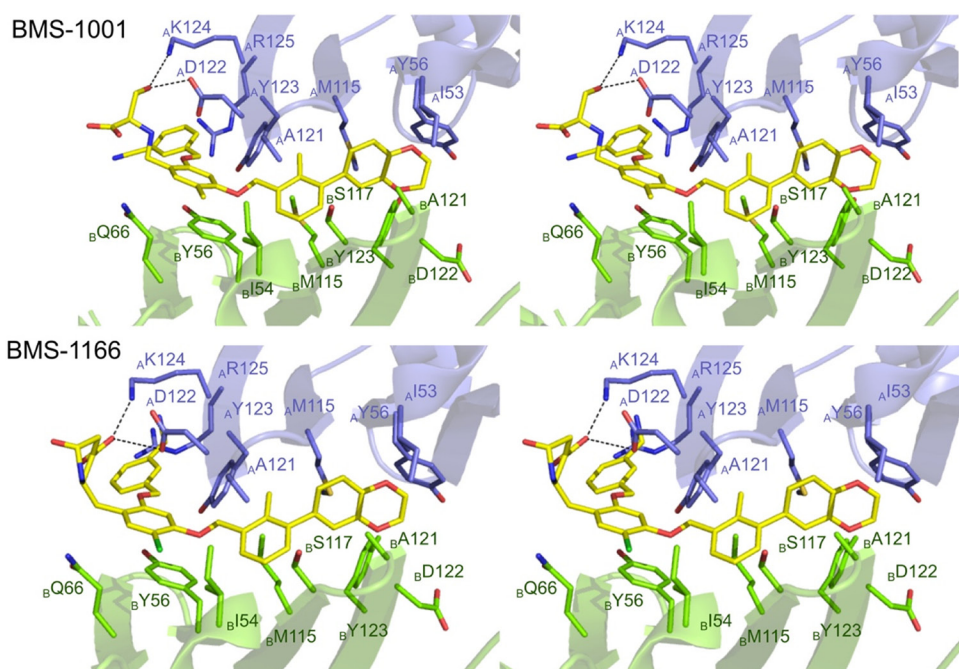

**Supplementary Figure 4: Detailed interactions of BMS-1001 and BMS-1166 with PD-L1 molecules.** Both inhibitors show similar binding modes within the 2,3-dihydro-1,4-benzodioxine moiety and central ring creating multiple hydrophobic interactions with both PD-L1 protomers. Flexible tails of both inhibitors create hydrogen bonds with lysine124 and aspartate122 stabilizing the 2,3-dihydro-1,4-benzodioxine group outside the binding tunnel.

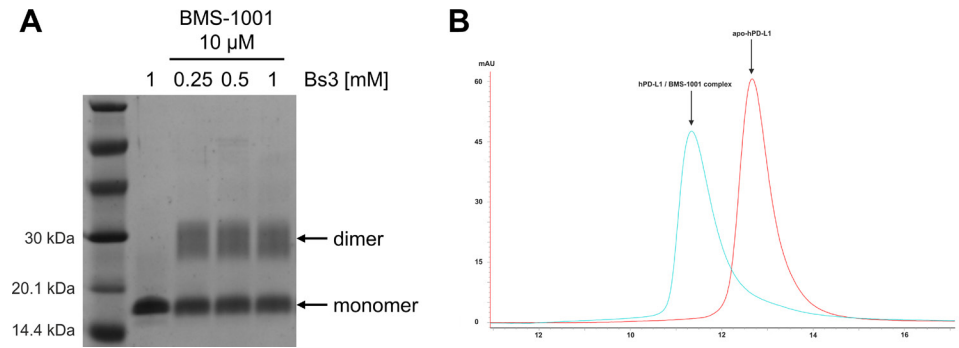

**Supplementary Figure 5: BMS-1001 and BMS-1166 provoke PD-L1 dimerization in solution.** (A) Cross-linking of hPD-L1 in presence of the BMS-1001 compound. Bands corresponding to the hPD-L1 monomer and dimer after cross-linking are present - indicating BMS-1001 induced dimerization. Control sample (hPD-L1 with 1 mM BS3 in absence of BMS-1001) contains only one band corresponding to molecular weight of the monomer. (B) Size exclusion chromatograms of hPD-L1 in the presence and absence of BMS-1001. The Apo-hPD-L1 peak exhibits longer retention time compared to that of the hPD-L1/BMS-1001 complex indicating the lower molecular weight corresponding to the monomer size. The peak for the hPD-L1/BMS-1001 complex is shifted and corresponds to the molecule with a double size of the monomer (the hPD-L1 dimer).
